# Supplementary material
Source: Springer Nature journal article supplement (https://www.springermedizin.de/resource/supplementary/12889_2013_5789_MOESM3_ESM.pdf/9496734)
Supplement: MOESM3 [file 9496734]

| Author       | Study arms   |                                                                                                                                                      |                                                                   |         |                                                              |                                                    | Location | Age    | Outcomes                                                 |
|--------------|--------------|------------------------------------------------------------------------------------------------------------------------------------------------------|-------------------------------------------------------------------|---------|--------------------------------------------------------------|----------------------------------------------------|----------|--------|----------------------------------------------------------|
|              | Intervention |                                                                                                                                                      |                                                                   | Control |                                                              |                                                    |          |        |                                                          |
|              | n            | Probiotic micro-organism (Dosage)                                                                                                                    | Duration & method of treatment                                    | n       | Placebo                                                      | Standard of care                                   |          |        |                                                          |
| Boudraa [12] | 56           | <i>L. bulgaricus</i> & <i>S. thermophilus</i> (2x10 <sup>8</sup> CFU/g)                                                                              | 180 mL/kg/day infant formula given after initial oral rehydration | 56      | Infant formula acidified with lactic acid to match yogurt pH | ORS & continued feeding                            | Algeria  | 3-24 m | Diarrhea duration                                        |
| Canani [13]  | 100          | <i>Lactobacillus rhamnosus GG</i> (6x10 <sup>9</sup> CFU/dose)                                                                                       | 2/day for 5 days in 20 ml water                                   | 92      | Not described                                                | ORS, then formula containing lactose or cow's milk | Italy    | 3-36 m | Diarrhea duration<br>Stool frequency<br>Hospitalizations |
|              | 91           | <i>S. boulardii</i> (5x10 <sup>9</sup> live micro-organisms/dose)                                                                                    | 2/day for 5 days in 20 ml water                                   | 92      |                                                              |                                                    |          |        |                                                          |
|              | 100          | <i>Bacillus clausii</i> (10 <sup>9</sup> CFU/dose)                                                                                                   | 2/day for 5 days in 20 ml water                                   | 92      |                                                              |                                                    |          |        |                                                          |
|              | 97           | <i>L. bulgaricus</i> , <i>L. acidophilus</i> , <i>Streptococcus thermophilus</i> , <i>B. bifidum</i> (5x10 <sup>8</sup> - 10 <sup>9</sup> CFU /dose) | 2/day for 5 days in 20 ml water                                   | 92      |                                                              |                                                    |          |        |                                                          |
|              | 91           | <i>Enterococcus faecium</i> (7.5x10 <sup>7</sup> CFU/dose)                                                                                           | 2/day for 5 days in 20 ml water                                   | 92      |                                                              |                                                    |          |        |                                                          |

|                       |                                              |                                                                                                                                                     |                                     |     |                                                |                                            |         |        |                                                          |
|-----------------------|----------------------------------------------|-----------------------------------------------------------------------------------------------------------------------------------------------------|-------------------------------------|-----|------------------------------------------------|--------------------------------------------|---------|--------|----------------------------------------------------------|
| Cetina-Sauri [18]     | 65                                           | <i>S. boulardii</i><br>(200 mg/dose)                                                                                                                | Every 8 hours in 5ml of cold liquid | 65  | 200mg glucose in 5ml cold liquid               | WHO oral electrolytes & continued feeding  | Mexico  | 3–36m  | Stool frequency                                          |
| Costa-Ribeiro [14]    | 61                                           | <i>Lactobacillus GG</i><br>(10x10 <sup>9</sup> CFU/day)                                                                                             | 1/day w/oral electrolyte solution   | 63  | Inulin                                         | ORS                                        | Brazil  | 1-24 m | Diarrhea duration                                        |
| Lee [15]              | 50                                           | <i>Lyophilized L. acidophilus</i> and <i>B. infantis</i><br>(3x10 <sup>9</sup> CFU of each organism/day)                                            | 1/day for 4 days                    | 50  | Not described                                  | Parenteral rehydration                     | Taiwan  | 6-60 m | Diarrhea duration<br>Stool frequency                     |
| Misra [16]            | 105                                          | <i>Lactobacillus GG</i><br>(1x10 <sup>9</sup> CFU/dose)                                                                                             | 1/day for 10 days                   | 105 | Identical placebo (crystalline microcellulose) | Not described                              | India   | < 36 m | Diarrhea duration                                        |
| Rafeey [19]           | 40                                           | <i>L. acidophilus</i><br>(5x10 <sup>9</sup> CFU /capsule)                                                                                           | 2 capsules/day                      | 40  | Not described                                  | WHO fluid therapy, no other fluids or food | Iran    | ≤ 60 m | Stool frequency                                          |
| Veereman-Wauters [17] | Diarrhea duration: 25<br>Stool frequency: 22 | <i>Lactobacillus GG</i> ,<br><i>L. acidophilus</i> , <i>L. casei</i> , <i>L. plantarum</i> , <i>B. infantis</i><br>(3x10 <sup>9</sup> CFU /capsule) | 3 capsules/day for 9 days           | 22  | Identical placebo (maltodextrine)              | ORS & continued feeding                    | Belgium | 1-60 m | Diarrhea duration<br>Stool frequency<br>Hospitalizations |
